# Supplementary material
Source: PubMed Central journal article supplement (PMC4674017)
Supplement: NIHMS738173-supplement-Supplementary_Figure_2.pdf [file NIHMS738173-supplement-Supplementary_Figure_2.pdf]

**Supplemental Material Figure 2.** The completed practice sleep diary below reflects the scenarios in Supplemental Material Figure 1.

| DAY / DATE                      | Watch Off<br>reason<br>length of time | Bedtime<br>Lights Out:<br><br>push the<br>event marker<br><u>write the<br/>watch time</u> | Morning<br>Wake Time:<br><br>push the<br>event marker<br><u>write the<br/>watch time</u> | Night waking times<br>and other comments:                                                                                                                                                                      |
|---------------------------------|---------------------------------------|-------------------------------------------------------------------------------------------|------------------------------------------------------------------------------------------|----------------------------------------------------------------------------------------------------------------------------------------------------------------------------------------------------------------|
| EXAMPLE<br>Monday, 1/2/2012     | Bath Time:<br>7:15 - 7:30             | 8:15 PM                                                                                   | 6:08 AM                                                                                  | Child woke up with a bad dream around 1 AM and stayed awake for 2 hours. Put back to bed 3 AM                                                                                                                  |
| Thursday, 3/1/2012<br>(Night 1) | Bath Time:<br>6:45 - 7:15 PM          | 8:30 PM                                                                                   | 6:45 AM                                                                                  | Woke at 2 AM, back to sleep in our bed at 4 AM.                                                                                                                                                                |
| Friday, 3/2/2012<br>(Night 2)   | Bath Time:<br>8 PM<br>Swimming 5-6 PM | 9:00 PM                                                                                   | 6:00 AM                                                                                  | Forgot to push the button at bedtime. Pushed ten minutes later.                                                                                                                                                |
| Saturday, 3/3/2012<br>(Night 3) | Bath: 8 PM                            | 9:00 PM                                                                                   | 5:00 AM                                                                                  | Fever and chills tonight. Heard him cry out at 9:15 PM so I went to his room to soothe him, he fell back asleep at 9:30 pm. Cried out a second time at 10 PM and I was able to get him back to sleep by 10:15. |
