# Supplementary material
Source: PubMed Central journal article supplement (PMC4674017)
Supplement: NIHMS738173-supplement-Supplementary_Figure_3.pdf [file NIHMS738173-supplement-Supplementary_Figure_3.pdf]

Supplemental Material Figure 3  
*Quiz to Determine Parental Comprehension*

- 1) I can call the study staff
  - a) 2 times each week
  - b) 1 time each month
  - c) Any time I have a question
  - d) Staff will only call if they have a question for me
- 2) My child will wear the actigraphy watch
  - a) When it works for me
  - b) 2 weeks
  - c) Weekends only
  - d) At set scheduled times
- 3) The information I will need to write on the sleep diary form includes:
  - a) Time 'lights are off for the night' for my child to go to sleep
  - b) When my child wakes up for the day
  - c) Any time my child wakes up after lights are out for the night
  - d) All of the above
- 4) I will need to do the following steps for the actigraphy watch device: **Circle all that apply**
  - a) Push the interval button at lights out for bedtime
  - b) Push the button when my child wakes the next morning
  - c) Take the watch off when my child goes to sleep each night
  - d) Remove the watch when my child takes a bath and write this time on the diary form
- 5) I can call the study staff any time I have a question
  - a) Yes, if yes, how would you find the number to call the staff? \_\_\_\_\_
  - b) No, if no, when is it OK to call the staff? \_\_\_\_\_
- 6) If my child cannot wear the actigraphy device on his/her wrist, I cannot be part of this project?
  - a) False
  - b) True
- 7) The words '**lights out**' on the sleep diary form means:
  - a) When I turn on the bedside lamp to read my child a story
  - b) When my child has finished a snack
  - c) When I leave the room, turn off the light and expect that my child would go to sleep for the night.
  - d) When I have put my child back in bed at least 2 times after I expect him/her to fall asleep
