# Supplementary material
Source: PubMed Central journal article supplement (PMC4674017)

## Supplemental Material Figure 4. Actigraphy Practice Scenarios

### Scenario 1

Child's bedtime with lights out is 8:30 pm. Child wakes from 2am to 4am. Awake for the day at 6:45am.

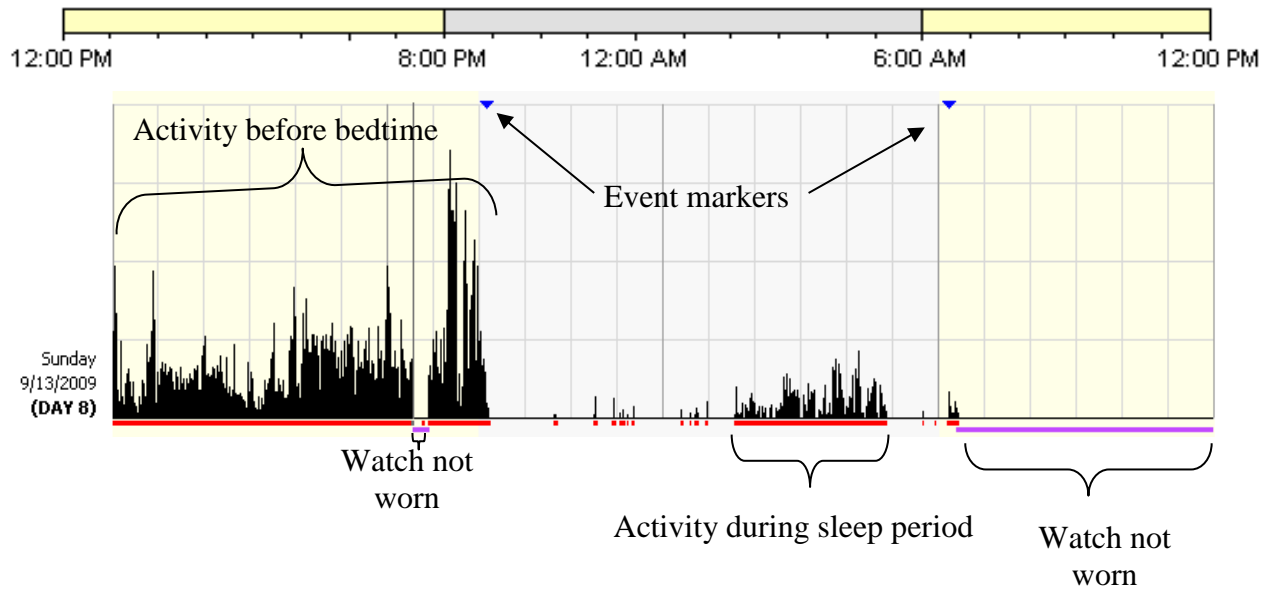

### Scenario 2

Child's bedtime with lights out is 9:00 pm and awake for the day at 6:00 am.

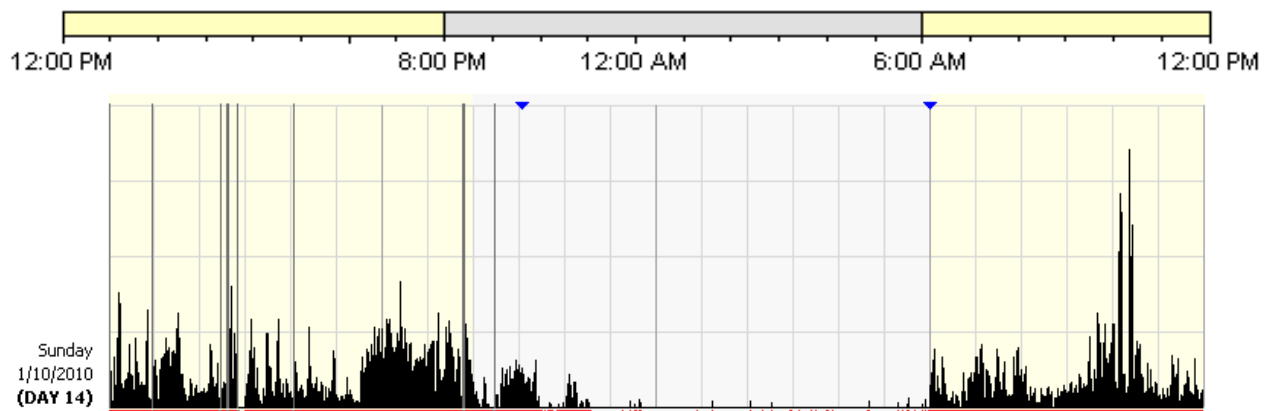

Supplement: NIHMS738173-supplement-Supplementary_Figure_4.pdf [file NIHMS738173-supplement-Supplementary_Figure_4.pdf]
